# Supplementary material for: Novel electronic structures and enhanced optical properties of boron phosphide/blue phosphorene and F4TCNQ/blue phosphorene heterostructures: a DFT + NEGF study
Source: Royal Society of Chemistry journal article supplement (doi:10.1039/c8cp05119d), 2018-01-01
Supplement: c8cp05119d1.pdf [file c8cp05119d1.pdf]

# **Blue phosphorene-Based Heterostructures: Type-II Semiconductors with Direct Band Gap and Enhanced Visible Light Absorption for Optoelectronic Applications**

Leqian Du<sup>a,#</sup>, Kai Zheng<sup>a,#</sup>, Heping Cui<sup>a</sup>, Yunhao Wang<sup>b</sup>, Luqi Tao<sup>a\*</sup>, Xianping Chen<sup>a\*</sup>

a) Key Laboratory of Optoelectronic Technology & Systems, Education Ministry of China, Chongqing University and College of Optoelectronic Engineering, Chongqing University, 400044 Chongqing, China.

b) School of Economics, Northeast Normal University, Changchun 130117, China.

<sup>#</sup> These authors contributed equally to this work.

\*Correspondence authors: Luqi Tao (taoluqi@126.com); Xianping Chen (xianpingchen@cqu.edu.cn)

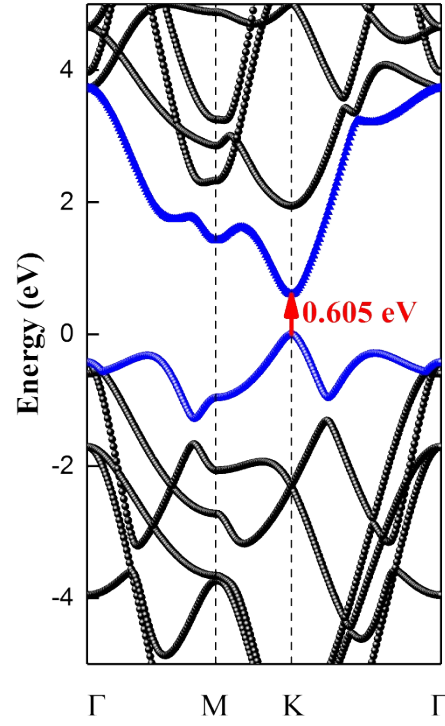

Fig. S1 The band structure of the ABIII pattern.

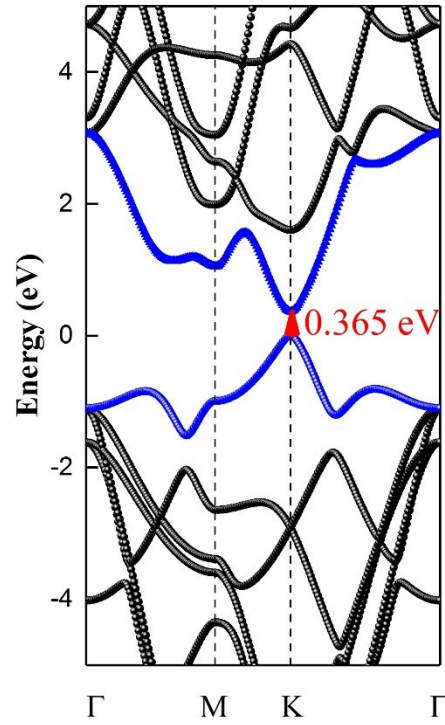

Fig. S2 The band structure of the ABIII pattern under an  $E$ -field of 0.001 a.u.

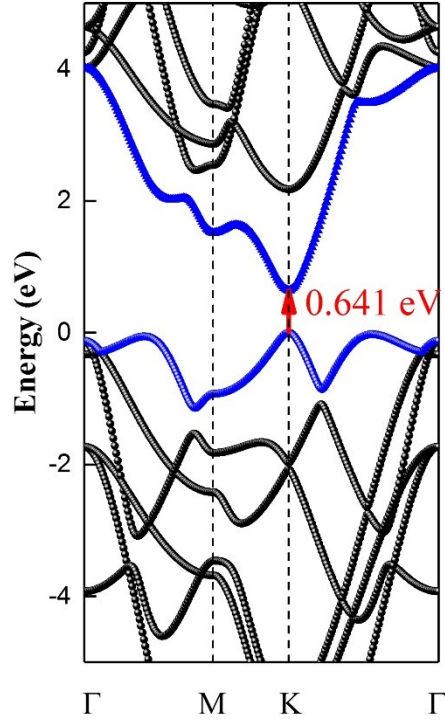

Fig. S3 The band structure of the ABIII pattern under an  $E$ -field of 0.002 a.u.

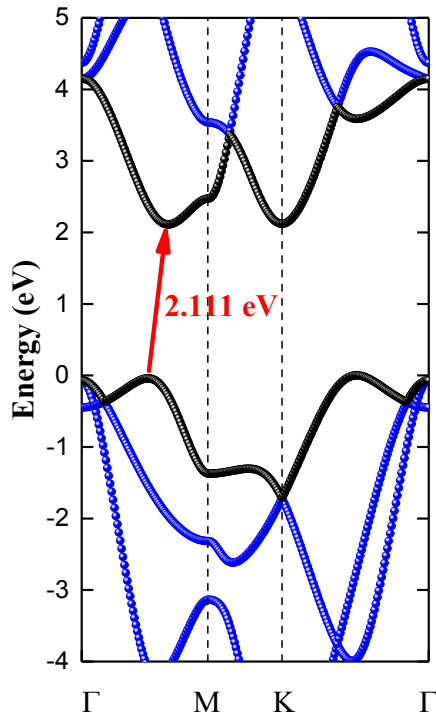

Fig. S4 The band structure of the isolated Blue-p with the same lattice constant
